# Supplementary material
Source: PubMed Central journal article supplement (PMC3421759)
Supplement: JVI.07143-11_zjv999096340so1.pdf [file JVI.07143-11_zjv999096340so1.pdf]

| <b>A</b>                  |                   |                                                                                                                                                      |
|---------------------------|-------------------|------------------------------------------------------------------------------------------------------------------------------------------------------|
| <b>siRNAs</b>             |                   | <b>5'-3' sequences</b>                                                                                                                               |
| si-p53                    | si-TA<br>(1 to 3) | GGA-AAC-UAC-UUC-CUG-AAA-A<br>CAG-ACC-UAU-GGA-AAC-UAC-U<br>CCU-GAA-AAC-AAC-GUU-CUG-U                                                                  |
|                           | si-E7-8           | ThermoScientific/Dharmacon reference #J-003329-14                                                                                                    |
| si-Δ133                   | si-Δ133p53(a)     | GGA-GGU-GCU-UAC-ACA-UGU-U                                                                                                                            |
|                           | si-Δ133p53(b)     | AAC-AUG-UGU-AAG-CAC-CUC-C                                                                                                                            |
| si-β                      |                   | GGA-CCA-GAC-CAG-CUU-UCA-A                                                                                                                            |
| <b>B</b>                  |                   |                                                                                                                                                      |
| <b>Primers and probes</b> |                   | <b>5'-3' sequences</b>                                                                                                                               |
| Actin                     |                   | GGC-ACC-CAG-CAC-AAT-GAA-G (forward)<br>GCC-GAT-CCA-CAC-GGA-GTA-CT (reverse)<br>TCA-AGA-TCA-TTG-CTC-CTC-CTG-AGC-GC (probe)                            |
| Δ133p53                   |                   | ACT-CTG-TCT-CCT-TCC-TCT-TCC-TAC-AG (forward)<br>GTG-TGG-AAT-CAA-CCC-ACA-GCT (reverse)<br>TCC-CCT-GCC-CTC-AAC-AAG-ATG-TTT-TGC-C (probe)               |
| p53β                      |                   | AAC-CAC-TGG-ATG-GAG-AAT-ATT-TCA-C (forward)<br>TCA-TAG-AAC-CAT-TTT-CAT-GCT-CTC-TT (reverse)<br>CAG-CAC-CAG-ACC-AGC-TTT-CAA-AAA-GAA-AAT-TGT-T (probe) |
| p53 (Exon8-9)             |                   | GAA-GAG-AAT-CTC-CGC-AAG-AAA-GG (forward)<br>TCC-ATC-CAG-TGG-TTT-CTT-CTT-TG (reverse)<br>AGC-ACT-AAG-CGA-GCA-CTG-CCC-AAC (probe)                      |

**Supplementary Table IA&B. siRNA, primers and probes used in this study.**

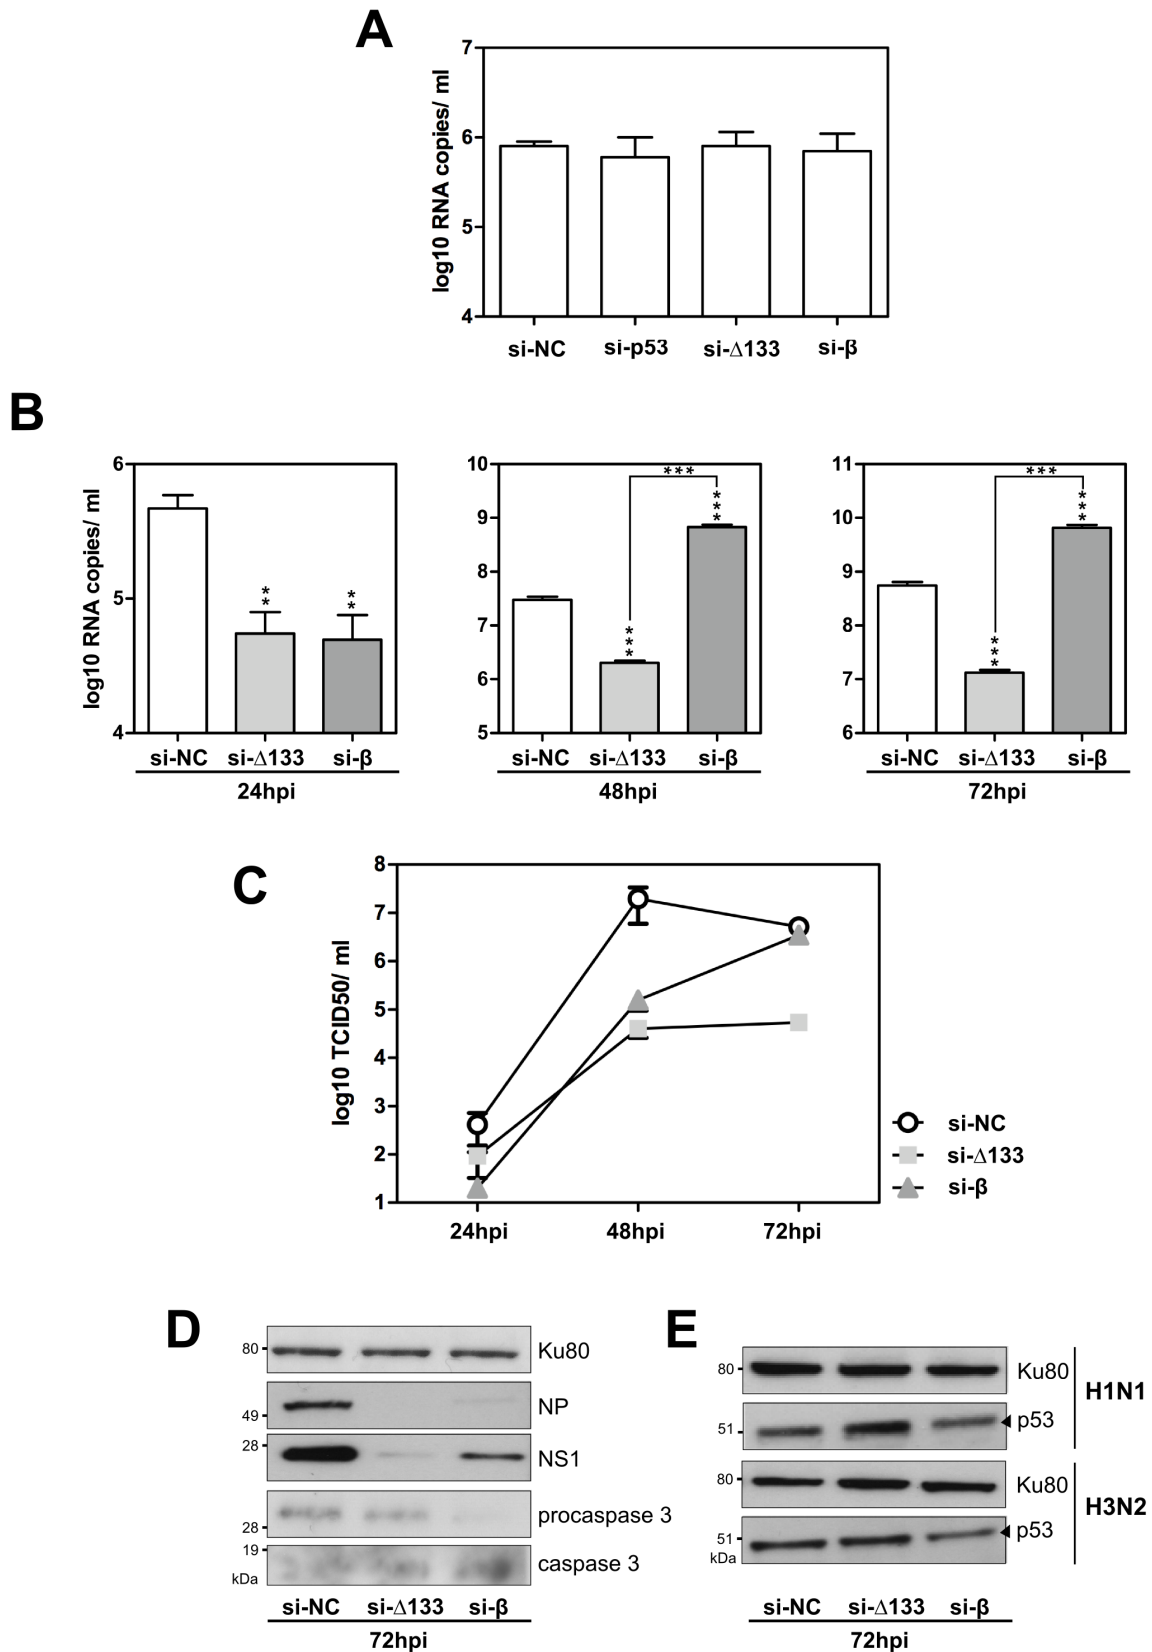

**Supplementary figure 1. Knockdown of  $\Delta 133p53\alpha$  and  $p53\beta$  expression in A549 cells differentially modulates H3N2 influenza production.** A. To exclude any artifactual effect of p53 siRNAs, H1299 (p53 null) cells were treated with the different siRNAs used in this

study and were infected, 48h after treatment, with A/NewCaledonia/20/99 (H1N1) at a MOI of 0.01. Supernatants and cells were harvested at 24hpi and viral production was assessed by RTqPCR (log<sub>10</sub> RNA copies/mL, measured in triplicate on 3 independent experiments). Results indicate that the different siRNAs treatment do not interfere with viral production. **B.** Human lung A549 cells were treated by siRNAs (non specific si-NC, siRNA-Δ133 or si-p53β respectively targeting Δ133p53 and p53β). Knockdown expression was verified by RTqPCR using a set of primers/probes specific of Δ133 or β forms at 48h post transfection (**supplementary table IA and IB**). **(B-E)** 48h after siRNA treatment, cells were infected at a MOI of 10<sup>-3</sup> with influenza virus A/Moscow/10/99 (H3N2) and cells and supernatants were harvested at 24, 48 and 72 hours post-infection for analysis. Viral production was assessed by three different techniques: **(B)** quantification of M viral genome segment (log RNA copies/mL) released in supernatants by RT-qPCR after vRNA extraction, **(C)** determination of infectious titers of supernatants (TCID<sub>50</sub>/mL) by end-point titration in MDCK cells and **(D)** analysis of NS1 expression by western blot at 72hpi. Expression of procaspase 3 and cleaved caspase 3 **(D)** as well as p53 **(E)** were also monitored by western blot at 72h post-infection. M genomic vRNA segments levels were measured in triplicate on two independent experiments and compiled to perform statistical analysis (*t*-student test \*, \*\*, \*\*\* respectively for a p-value <0.05, 0.005 and 0,001). For the infectious titers, the TCID<sub>50</sub> was calculated by the Reed and Muench statistical method.

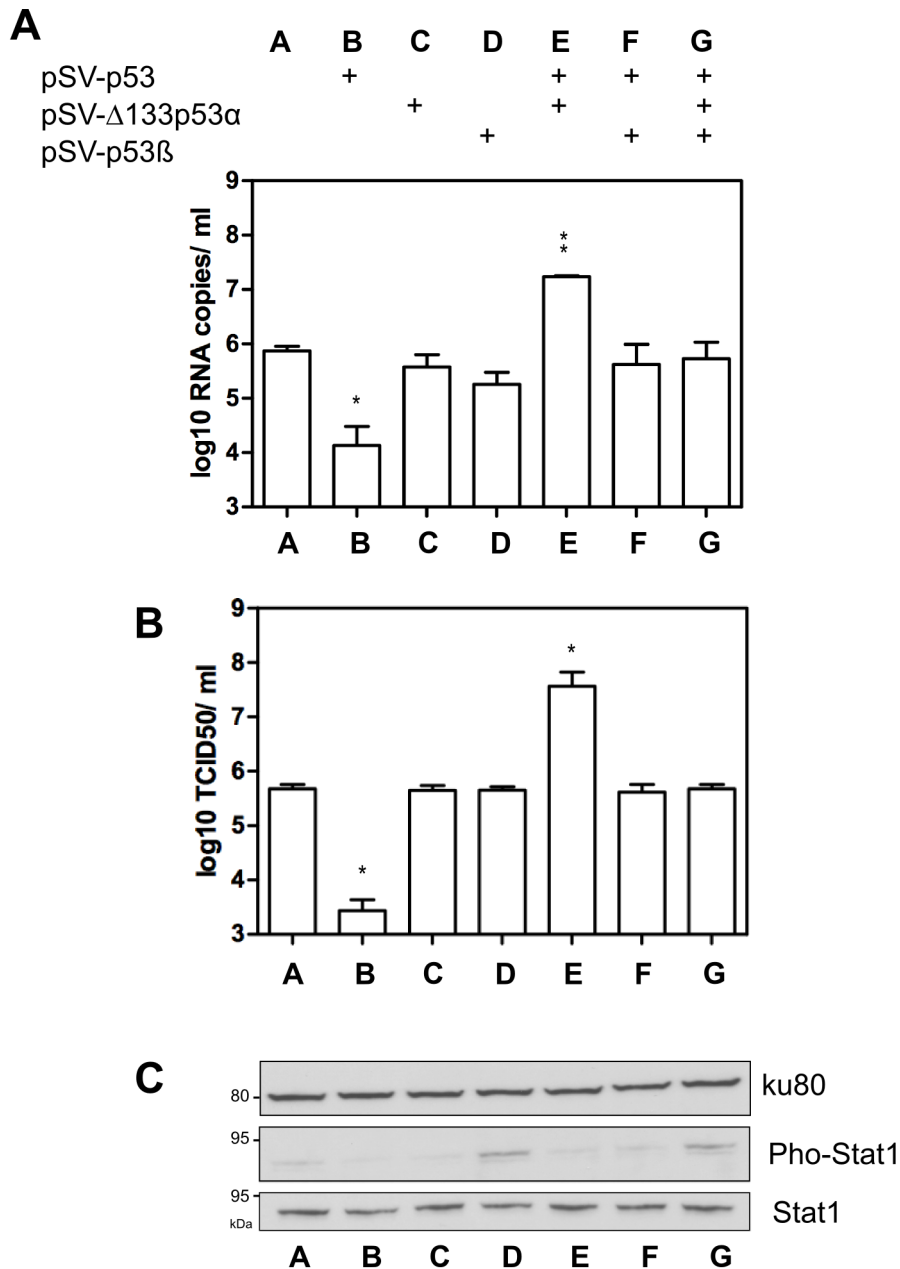

**Supplementary figure 2. Transient co-expression of p53 isoforms in H1299 cells differentially impacts on the level of viral production.** Human lung H1299 cells (p53-null) were transfected with different combination of pSV constructs expressing p53,  $\Delta$ 133p53 $\alpha$  or p53 $\beta$ . **A.** The level of ectopic protein expression was verified 24h post-transfection by western blot using the SAPU antibody, recognizing all p53 isoforms. Ku80 was used as a loading control. #1 and #2 indicate the  $\Delta$ 40p53 $\beta$  and the  $\Delta$ 160p53 $\alpha$  (Marcel *et al.* 2010a), respectively. Transfected cells were then infected by

influenza virus A/Moscow/10/99 (H3N2) at a MOI of 0.01. Supernatants and cells were harvested at 24hpi and viral production was assessed by two different techniques: **B.** RTqPCR, (log<sub>10</sub> RNA copies/mL, measured in triplicate on 3 independent experiments) or **C.** determination of infectious titers of supernatants (log<sub>10</sub> TCID<sub>50</sub>/mL) by end-point titration in MDCK cells (measured in quadruplicate on 2 independent experiments). For panels A and B : *t*-student test \* and \*\* respectively for a p-value <0.05 and <0.005. **C.** Total protein lysates were harvested 24hpi and expression of Stat1 and phosphorylated Stat1 was analysed. Ku80 was used as a loading control.
